# Supplementary material for: Triglyceride and high density lipoprotein cholesterol concentrations quantitative analysis in whole blood by FTIR-ATR spectroscopy and FT-Raman spectroscopy
Source: Royal Society of Chemistry journal article supplement (doi:10.1039/c8ay01620h), 2018-01-01
Supplement: c8ay01620h1.pdf [file c8ay01620h1.pdf]

## Supplementary

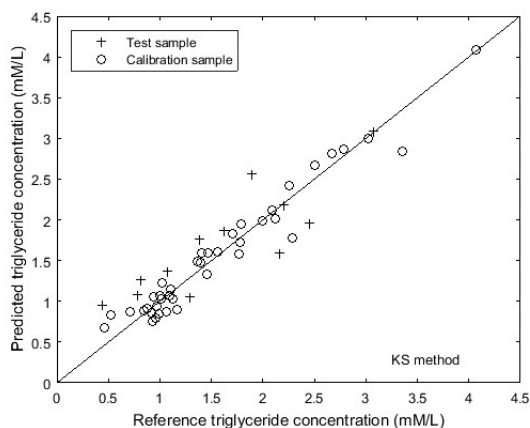

**Fig. 1** Predicted TG concentration of PLS-KS model based on FTIR-ATR spectra versus the reference TG concentration

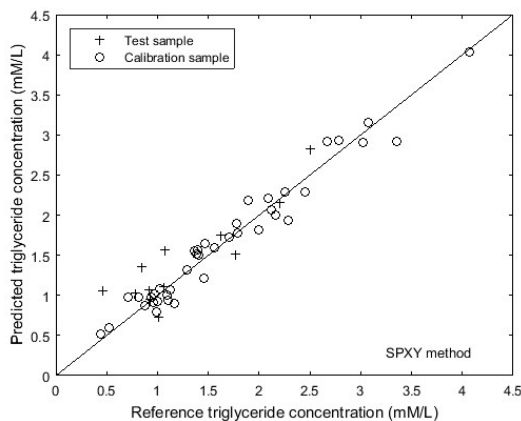

**Fig. 2** Predicted TG concentration of PLS-SPXY model based on FTIR-ATR spectra versus the reference TG concentration

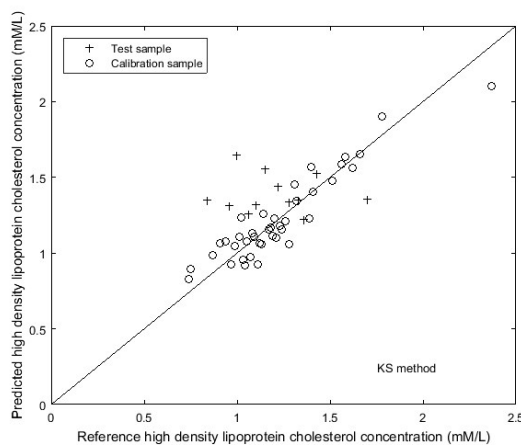

**Fig.3** Predicted HDL-C concentration of PLS-KS model based on FTIR-ATR spectra versus the reference HDL-C concentration

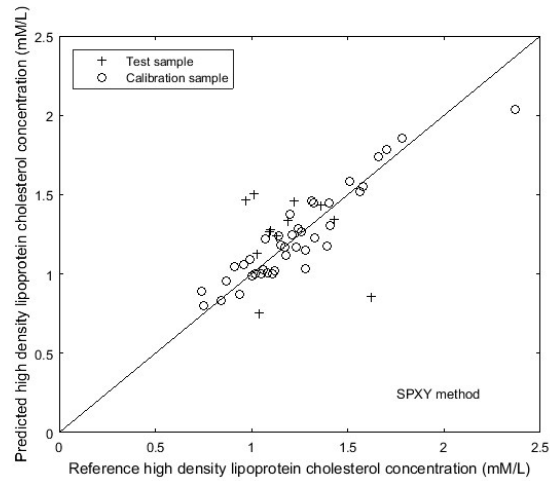

**Fig. 4 Predicted HDL-C concentration of PLS-SPXY model based on FTIR-ATR spectra versus the reference HDL-C concentration**

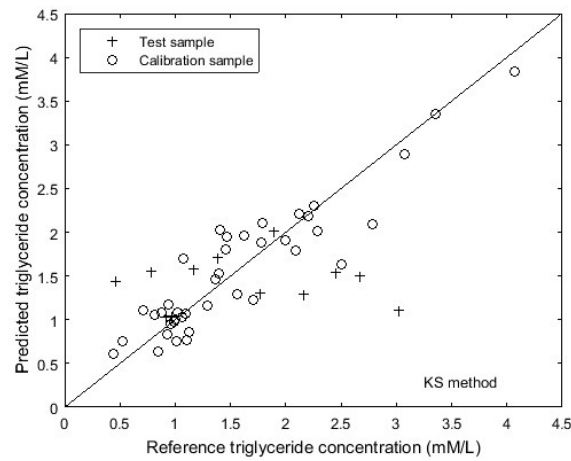

**Fig. 5 Predicted TG concentration of PLS-KS model based on FT-Raman spectra versus the reference TG concentration**

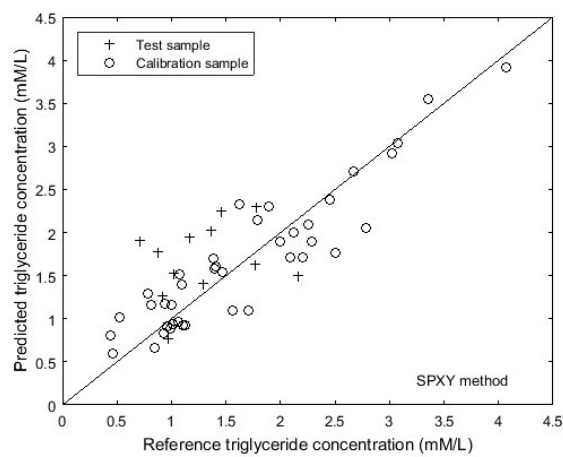

**Fig. 6 Predicted TG concentration of PLS-SPXY model based on FT-Raman spectra versus the reference TG concentration**

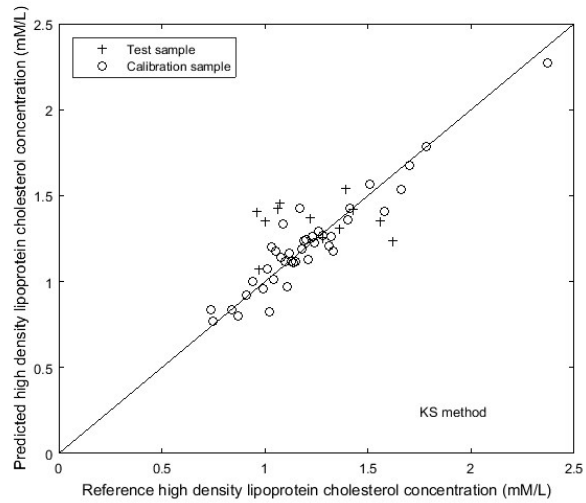

**Fig. 7 Predicted HDL-C concentration of PLS-KS model based on FT-Raman spectra versus the reference HDL-C concentration**

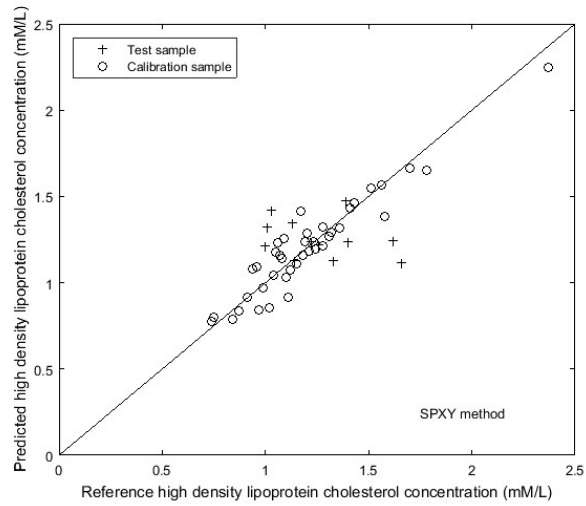

**Fig. 8 Predicted HDL-C concentration of PLS-SPXY model based on FT-Raman spectra versus the reference HDL-C concentration**
